# Supplementary material
Source: Springer Nature journal article supplement (https://www.springermedizin.de/resource/supplementary/13054_2011_9793_MOESM4_ESM.pdf/9706992)

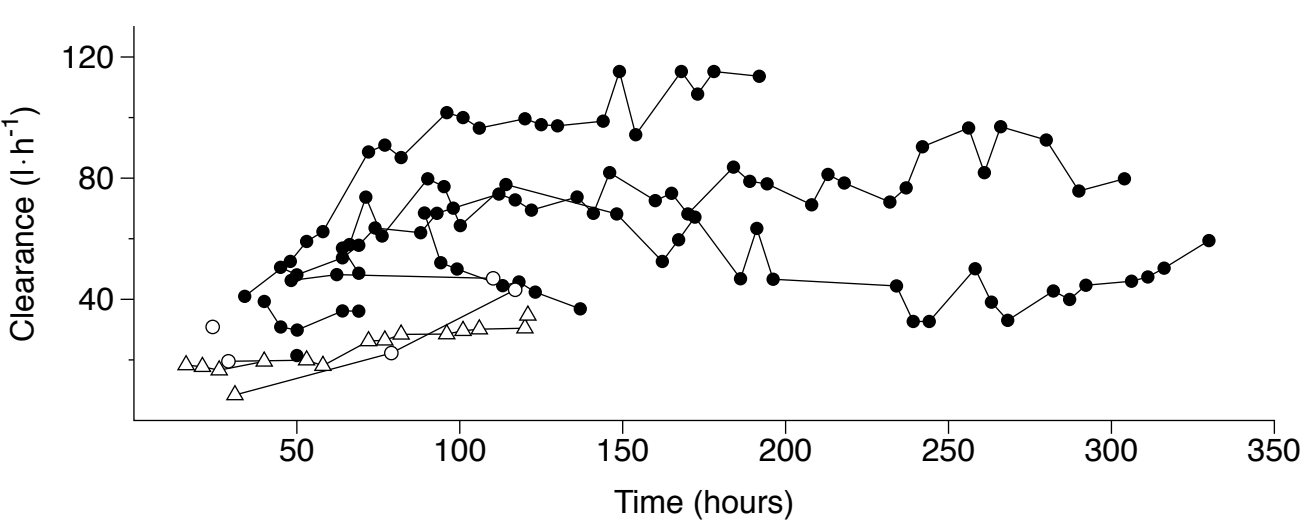

Supplement: MOESM4 [file 9706992]
